# Supplementary material for: Age-specific DNA methylation alterations in sperm at imprint control regions may contribute to the risk of autism spectrum disorder in offspring
Source: publisher site journal article supplement (doi:10.18632/aging.206348), 2025-12-29
Supplement: Supplementary file [file aging-v17i12-206348-supplementary-material-SD2.pdf]

## SUPPLEMENTARY TABLES

**Supplementary Table 1. Distribution of CpGs by island content within the 450K array.**

| CpG island content | Total of analyzed CpG sites |       | DNA methylation subgroups |       |          |       |          |       |
|--------------------|-----------------------------|-------|---------------------------|-------|----------|-------|----------|-------|
|                    |                             |       | UM                        |       | HM       |       | FM       |       |
|                    | <i>n</i>                    | %     | <i>N</i>                  | %     | <i>N</i> | %     | <i>n</i> | %     |
| Island             | 149,092                     | 30.91 | 131,110                   | 87.94 | 4,875    | 3.27  | 13,107   | 8.79  |
| Shore              | 111,367                     | 23.09 | 67,762                    | 60.85 | 15,613   | 14.02 | 27,992   | 25.13 |
| Shelf              | 46,845                      | 9.71  | 2,419                     | 5.16  | 5,792    | 12.36 | 38,634   | 82.47 |
| OpenSea            | 174,983                     | 36.28 | 25,141                    | 14.37 | 22,111   | 12.64 | 127,731  | 73.00 |
|                    | 482,287                     | 100   | 226,432                   |       | 48,391   |       | 207,464  |       |

All CpG sites of the analytic 450K are targeted by a specific region of CpG neighborhood content, then presented by DNA methylation subgroups: Unmethylated (UM), Hemi-methylated (HM), or Fully methylated (FM) (UM:  $\beta$ -value <0.2; HM:  $\beta$ -value (0.2–0.8); FM:  $\beta$ -value >0.8).

**Supplementary Table 2. Distribution of CpGs by island content after age-related analysis.**

| CpG island content | Differentially Methylated CpG sites                       |                |                |                                       |       |                                         |       |                                         |       |
|--------------------|-----------------------------------------------------------|----------------|----------------|---------------------------------------|-------|-----------------------------------------|-------|-----------------------------------------|-------|
|                    | Total                                                     |                |                | UM                                    |       | HM                                      |       | FM                                      |       |
|                    | <i>n</i>                                                  | % <sup>1</sup> | % <sup>2</sup> | <i>n</i>                              | %     | <i>n</i>                                | %     | <i>n</i>                                | %     |
| Island             | 722                                                       | 4.94           | 0.15           | 325                                   | 13.46 | 280                                     | 4.38  | 117                                     | 2.01  |
|                    | 320 <sup>+</sup> (44.32%); 402 <sup>-</sup> (55.68%)      |                |                | 96 <sup>+</sup> ; 229 <sup>-</sup>    |       | 143 <sup>+</sup> ; 137 <sup>-</sup>     |       | 81 <sup>+</sup> ; 36 <sup>-</sup>       |       |
|                    | Ratio: 1.26                                               |                |                | Ratio: 2.38                           |       | Ratio: 0.95                             |       | Ratio: 0.44                             |       |
| Shore              | 7,182                                                     | 49.12          | 1.49           | 1,753                                 | 72.62 | 3,729                                   | 58.36 | 1,700                                   | 29.22 |
|                    | 278 <sup>+</sup> (3.87%); 6,904 <sup>-</sup> (96.13%)     |                |                | 66 <sup>+</sup> ; 1,687 <sup>-</sup>  |       | 123 <sup>+</sup> ; 3,606 <sup>-</sup>   |       | 89 <sup>+</sup> ; 1,611 <sup>-</sup>    |       |
|                    | Ratio: 24.83                                              |                |                | Ratio: 25.56                          |       | Ratio: 29.3                             |       | Ratio: 18.10                            |       |
| Shelf              | 1,575                                                     | 10.77          | 0.33           | 93                                    | 3.85  | 521                                     | 8.15  | 961                                     | 16.52 |
|                    | 258 <sup>+</sup> (16.38%); 1,317 <sup>-</sup> (83.62%)    |                |                | 2 <sup>+</sup> ; 91 <sup>-</sup>      |       | 71 <sup>+</sup> ; 450 <sup>-</sup>      |       | 185 <sup>+</sup> ; 776 <sup>-</sup>     |       |
|                    | Ratio: 5.10                                               |                |                | Ratio: 45.45                          |       | Ratio: 6.34                             |       | Ratio: 4.19                             |       |
| Open Sea           | 5,143                                                     | 35.17          | 1.06           | 243                                   | 10.07 | 1,860                                   | 29.11 | 3,040                                   | 52.25 |
|                    | 3,675 <sup>+</sup> (71.46%); 1,468 <sup>-</sup> (28.54%)  |                |                | 33 <sup>+</sup> ; 210 <sup>-</sup>    |       | 1,278 <sup>+</sup> ; 82 <sup>-</sup>    |       | 2,364 <sup>+</sup> ; 676 <sup>-</sup>   |       |
|                    | Ratio: 0.40                                               |                |                | Ratio: 6.36                           |       | Ratio: 0.45                             |       | Ratio: 0.29                             |       |
| All                | 14,622                                                    | 100            | 3.03           | 2,414                                 | 100   | 6,390                                   | 100   | 5,818                                   | 100   |
|                    | 4,531 <sup>+</sup> (30.99%); 10,091 <sup>-</sup> (69.01%) |                |                | 197 <sup>+</sup> ; 2,217 <sup>-</sup> |       | 1,615 <sup>+</sup> ; 4,775 <sup>-</sup> |       | 2,719 <sup>+</sup> ; 3,099 <sup>-</sup> |       |

Significant age-related DMCs are grouped by DNA methylation subgroups: Unmethylated (UM), Hemi-methylated (HM), or Fully methylated (FM) (UM:  $\beta$ -value <0.2; HM:  $\beta$ -value (0.2–0.8); FM:  $\beta$ -value >0.8). Adjusted *p*-values are used (BH method; FDR ≤0.05). (+) positive correlation with age; (–) negative correlation with age. The ratio is calculated as a negative *versus* a positive correlation. (%) calculated relative to the total number of sites within subgroups. <sup>1</sup>% calculated in relation to the total number of DMCs (*n* = 14,622); <sup>2</sup>% calculated to the total number of CpGs tested at the 450K array.

**Supplementary Table 3. Distribution of age-associated DMCs in sperm by functional genomic allocations.**

|                                 | Differentially Methylated CpG sites |       |          |       |          |       |          |       |
|---------------------------------|-------------------------------------|-------|----------|-------|----------|-------|----------|-------|
|                                 | Total                               |       | UM       |       | HM       |       | FM       |       |
| Functional genomic distribution | <i>n</i>                            | %     | <i>N</i> | %     | <i>N</i> | %     | <i>n</i> | %     |
| Promoter                        | 2,710                               | 18.54 | 669      | 27.71 | 1,297    | 20.30 | 744      | 12.79 |
| 1stExon                         | 160                                 | 1.09  | 15       | 0.62  | 50       | 0.78  | 95       | 1.63  |
| 5'UTR                           | 873                                 | 5.97  | 154      | 6.38  | 365      | 5.71  | 354      | 6.08  |
| Body                            | 4,266                               | 29.18 | 614      | 25.43 | 1,755    | 27.46 | 1,897    | 32.61 |
| 3'UTR                           | 519                                 | 3.55  | 69       | 2.86  | 216      | 3.38  | 234      | 4.02  |
| Intergenic                      | 4,586                               | 31.36 | 565      | 23.41 | 2,010    | 31.46 | 2,011    | 34.57 |
| Multiple allocation             | 1,508                               | 10.31 | 328      | 13.59 | 697      | 10.91 | 483      | 8.30  |
| Total                           | 14,622                              | 100   | 2,414    | 100   | 6,390    | 100   | 5,818    | 100   |

Distributions are shown for all significant DMCs and by subgroups: Unmethylated (UM), Hemi-methylated (HM), or Fully methylated (FM) (UM:  $\beta$ -value <0.2; HM:  $\beta$ -value (0.2–0.8); FM:  $\beta$ -value >0.8). CpG sites allocated to multiple regions are reported as a separate category (multiple allocation).
